# Supplementary material
Source: publisher figshare collection journal article supplement (https://gsajournals.figshare.com/ndownloader/files/19181714)
Supplement: Supplementary file 1 [file 19181714]

chr1	5399369	5399536	CON1	167	-
chr1	21461463	21461630	CON1	167	+
chr1	21466215	21466383	CON2	168	+
chr1	21468107	21468277	HLS2	170	+
chr1	21469651	21469821	HLS3	170	+
chr1	21471191	21471363	CON3	172	+
chr1	109115619	109115794	CON6	175	-
chr1	109120212	109120379	CON4	167	-
chr1	109122702	109122867	CON1	165	-
chr1	110468558	110468727	CON3	169	-
chr1	110469350	110469456	G4	106	-
chr1	110470179	110470349	HLS3	170	-
chr1	110471897	110472067	HLS2	170	-
chr1	110473436	110473608	HLS1	172	-
chr1	110473753	110473922	CON3	169	-
chr1	110475317	110475487	HLS3	170	-
chr1	110479165	110479332	CON1	167	-
chr1	110679010	110679177	CON1	167	+
chr1	110687254	110687424	HLS3	170	+
chr1	110688148	110688254	G4	106	+
chr1	110688870	110689042	HLS1	172	+
chr1	110690413	110690583	HLS2	170	+
chr1	110691974	110692147	HLS3	173	+
chr1	110692870	110692976	G4	106	+
chr1	110693584	110693752	CON3	168	+
chr1	112148045	112148205	CON1	160	+
chr1	112150366	112150534	CON2	168	+
chr1	112152236	112152405	HLS2	169	+
chr1	112153789	112153952	HLS3	163	+
chr1	112155813	112155983	CON6	170	+
chr1	112270114	112270286	CON3	172	-
chr1	112271675	112271849	HLS3	174	-
chr1	112273239	112273409	HLS2	170	-
chr1	112274780	112274909	HLS1	129	-
chr1	112428091	112428258	CON1	167	+
chr1	112644751	112644918	CON1	167	-
chr1	113176576	113176660	HLS1	84	-
chr1	113620464	113620627	CON7	163	+
chr1	113666844	113667013	CON3	169	-
chr1	113668398	113668571	HLS3	173	-
chr1	113669964	113670133	HLS2	169	-
chr1	113671504	113671674	HLS1	170	-
chr1	113673388	113673556	CON2	168	-
chr1	113679527	113679694	CON1	167	-
chr1	116838362	116838530	CON1	168	+
chr1	116841422	116841590	CON4	168	+
chr1	116843491	116843663	CON5	172	+
chr1	116845114	116845297	CON2	183	+
chr1	116847130	116847299	CON6	169	+
chr1	127572410	127572568	CON8	158	+
chr1	127672887	127673059	CON3	172	-
chr1	127674411	127674578	HLS3	167	-
chr1	127675963	127676131	HLS2	168	-
chr1	127677501	127677671	HLS2	170	-
chr1	127679412	127679574	CON2	162	-
chr1	127684169	127684335	CON1	166	-
chr1	127833530	127833688	CON8	158	+
chr1_AACZ03149866_random	9695	9867	CON3	172	-
chr1_AACZ03149866_random	10473	10578	G4	105	-
chr1_AACZ03149866_random	11302	11474	HLS3	172	-
chr1_AACZ03149866_random	12866	13036	HLS2	170	-
chr1_AACZ03150013_random	1029	1197	CON2	168	+
chr1_AACZ03150013_random	2920	3090	HLS3	170	+
chr1_AACZ03150013_random	3814	3919	G4	105	+
chr1_AACZ03150013_random	4527	4696	CON3	169	+
chr1_AACZ03151811_random	631	799	CON2	168	-
chr1_GL389075_random	18188	18355	CON1	167	+
chr1_GL389075_random	22015	22185	HLS1	170	+
chr1_GL389075_random	23554	23724	HLS2	170	+
chr1_GL389075_random	25106	25280	HLS3	174	+
chr1_GL389075_random	26004	26107	G4	103	+
chr1_GL389075_random	26717	26887	CON3	170	+
chr1_GL389076_random	12890	13057	CON1	167	+
chr1_GL389077_random	702	869	CON1	167	+
chr1_GL389078_random	4374	4541	CON1	167	+
chr1_GL389078_random	8283	8450	CON1	167	+
chr1_GL389078_random	12118	12288	HLS3	170	+
chr1_GL389078_random	13776	13945	CON3	169	+
chr1_GL389078_random	14090	14262	HLS1	172	+
chr1_GL389078_random	15631	15801	HLS2	170	+
chr1_GL389078_random	17202	17374	HLS3	172	+
chr1_GL389078_random	18372	18540	CON3	168	+
chr1_GL389079_random	10724	10891	CON1	167	+
chr1_GL389079_random	16111	16279	CON2	168	+
chr1_GL389079_random	17983	18153	HLS3	170	+
chr1_GL389079_random	19523	19693	HLS2	170	+
chr1_GL389079_random	21064	21237	HLS3	173	+
chr1_GL389079_random	22630	22799	CON3	169	+
chr1_GL389093_random	5023	5196	HLS3	173	+
chr1_GL389093_random	6578	6747	CON3	169	+
chr1_GL389094_random	3617	3787	HLS3	170	+
chr1_GL389094_random	5185	5354	CON3	169	+
chr1_GL389095_random	546	713	CON1	167	+
chr1_GL389095_random	4880	5050	HLS3	170	+
chr1_GL389095_random	6460	6629	CON3	169	+
chr1_GL389095_random	7528	7698	HLS1	170	+
chr1_GL389095_random	9070	9240	HLS2	170	+
chr1_GL389095_random	10631	10801	HLS3	170	+
chr1_GL389095_random	12146	12319	HLS3	173	+
chr1_GL389095_random	13713	13882	CON3	169	+
chr1_GL389121_random	14947	15118	CON3	171	-
chr1_GL389121_random	16519	16693	HLS3	174	-
chr1_GL389121_random	17552	17715	HLS3	163	-
chr1_GL389122_random	1131	1263	CON1	132	-
chr1_GL389150_random	79758	79929	CON3	171	-
chr1_GL389150_random	81327	81500	HLS3	173	-
chr1_GL389150_random	82906	83076	HLS2	170	-
chr1_GL389150_random	84450	84622	HLS1	172	-
chr1_GL389150_random	86332	86500	CON2	168	-
chr1_GL389150_random	91687	91854	CON1	167	-
chr1_GL389196_random	73904	74076	CON3	172	-
chr1_GL389196_random	75472	75645	HLS3	173	-
chr1_GL389196_random	77064	77234	HLS2	170	-
chr1_GL389196_random	78604	78774	HLS1	170	-
chr1_GL389196_random	80478	80646	CON2	168	-
chr1_GL389196_random	86998	87165	CON1	167	-
chr1_GL389250_random	9552	9725	HLS3	173	+
chr1_GL389250_random	11126	11297	CON3	171	+
chr3	37194340	37194520	CON6	180	-
chr3	37195151	37195319	CON5	168	-
chr3	37197337	37197506	CON1	169	-
chr5	29179311	29179486	CON6	175	-
chr5	29181293	29181459	CON5	166	-
chr5	29183374	29183541	CON4	167	-
chr5	29185859	29186024	CON1	165	-
chrUn_AACZ03188907	535	702	CON1	167	-
chrUn_AACZ03190716	72	245	HLS3	173	+
chrUn_AACZ03190716	1644	1815	CON3	171	+
chrUn_GL393538	86961	87128	CON1	167	+
chrUn_GL393538	92405	92573	CON2	168	+
chrUn_GL393538	94277	94447	HLS1	170	+
chrUn_GL393538	95817	95987	HLS2	170	+
chrUn_GL393538	97405	97578	HLS3	173	+
chrUn_GL393538	98301	98406	G4	105	+
chrUn_GL393538	99017	99185	CON3	168	+
chrUn_GL393538	146569	146731	CON7	162	-
chrUn_GL393588	754	924	HLS1	170	+
chrUn_GL393588	4152	4257	G4	105	+
chrUn_GL393588	4858	5030	CON3	172	+
chrUn_GL395264	3968	4134	CON1	166	+
chrUn_GL395264	8452	8621	CON3	169	+
chrUn_GL395264	8766	8938	HLS1	172	+
chrUn_GL395264	10307	10479	HLS2	172	+
chrUn_GL395264	11868	12041	HLS3	173	+
chrUn_GL395264	13430	13599	CON3	169	+
